# Supplementary material
Source: PubMed Central journal article supplement (PMC5850316)
Supplement: cix233_suppl_supplementary_material.pdf [file cix233_suppl_supplementary_material.pdf]

## **Supplementary File: Additional References (Main manuscript)**

61. Karlowsky JA, Kelly LJ, Thornsberry C, Jones ME, Sahm DF. Trends in antimicrobial resistance among urinary tract infection isolates of *Escherichia coli* from female outpatients in the United States. *Antimicrobial agents and chemotherapy* 2002; **46**(8): 2540-5.
62. Bean DC, Krahe D, Wareham DW. Antimicrobial resistance in community and nosocomial *Escherichia coli* urinary tract isolates, London 2005-2006. *Annals of clinical microbiology and antimicrobials* 2008; **7**: 13.
63. Kronenberg A, Koenig S, Droz S, Muhlemann K. Active surveillance of antibiotic resistance prevalence in urinary tract and skin infections in the outpatient setting. *Clinical microbiology and infection : the official publication of the European Society of Clinical Microbiology and Infectious Diseases* 2011; **17**(12): 1845-51.
64. Gotfried MH. Epidemiology of clinically diagnosed community-acquired pneumonia in the primary care setting: results from the 1999-2000 respiratory surveillance program. *The American journal of medicine* 2001; **111 Suppl 9A**: 25S-9S; discussion 36S-8S.
65. Morrissey I, Robbins M, Viljoen L, Brown DF. Antimicrobial susceptibility of community-acquired respiratory tract pathogens in the UK during 2002/3 determined locally and centrally by BSAC methods. *The Journal of antimicrobial chemotherapy* 2005; **55**(2): 200-8.
66. Farrell DJ, Klugman KP, Pichichero M. Increased antimicrobial resistance among nonvaccine serotypes of *Streptococcus pneumoniae* in the pediatric population after the introduction of 7-valent pneumococcal vaccine in the United States. *The Pediatric infectious disease journal* 2007; **26**(2): 123-8.
67. Angoulvant F, Cohen R, Doit C, et al. Trends in antibiotic resistance of *Streptococcus pneumoniae* and *Haemophilus influenzae* isolated from nasopharyngeal flora in children with acute otitis media in France before and after 13 valent pneumococcal conjugate vaccine introduction. *BMC infectious diseases* 2015; **15**: 236.
68. Coenen S, Goossens H. Antibiotic treatment failure in primary care. *BMJ (Clinical research ed)* 2014; **349**: g5970.
69. Giesen LG, Cousins G, Dimitrov BD, van de Laar FA, Fahey T. Predicting acute uncomplicated urinary tract infection in women: a systematic review of the diagnostic accuracy of symptoms and signs. *BMC family practice* 2010; **11**: 78.
70. Falagas ME, Kotsantis IK, Vouloumanou EK, Rafailidis PI. Antibiotics versus placebo in the treatment of women with uncomplicated cystitis: a meta-analysis of randomized controlled trials. *The Journal of infection* 2009; **58**(2): 91-102.
71. Minnaard MC, van de Pol AC, Hopstaken RM, et al. C-reactive protein point-of-care testing and associated antibiotic prescribing. *Family practice* 2016.
72. Holm A, Cordoba G, Sorensen TM, Jessen LR, Siersma V, Bjerrum L. Point of care susceptibility testing in primary care - does it lead to a more appropriate prescription of antibiotics in patients with uncomplicated urinary tract infections? Protocol for a randomized controlled trial. *BMC family practice* 2015; **16**: 106.
73. Bates J, Thomas-Jones E, Pickles T, et al. Point of care testing for urinary tract infection in primary care (POETIC): protocol for a randomised controlled trial of the clinical and cost effectiveness of FLEXICULT informed management of uncomplicated UTI in primary care. *BMC family practice* 2014; **15**: 187.
74. Hooton TM, Scholes D, Hughes JP, et al. A prospective study of risk factors for symptomatic urinary tract infection in young women. *The New England journal of medicine* 1996; **335**(7): 468-74.
75. European Centre for Disease Prevention and Control. Antimicrobial resistance surveillance in Europe 2014. Annual report of the European Antimicrobial Resistance Surveillance Network (EARS-Net). Stockholm: ECDC, 2015.

76. Welte T, Torres A, Nathwani D. Clinical and economic burden of community-acquired pneumonia among adults in Europe. *Thorax* 2012; **67**(1): 71-9.
77. Cane J, O'Connor D, Michie S. Validation of the theoretical domains framework for use in behaviour change and implementation research. *Implementation science : IS* 2012; **7**: 37.
78. Coxeter P, Del Mar CB, McGregor L, Beller EM, Hoffmann TC. Interventions to facilitate shared decision making to address antibiotic use for acute respiratory infections in primary care. *The Cochrane database of systematic reviews* 2015; **11**: Cd010907.
79. Tonkin-Crine S, Yardley L, Little P. Antibiotic prescribing for acute respiratory tract infections in primary care: a systematic review and meta-ethnography. *The Journal of antimicrobial chemotherapy* 2011; **66**(10): 2215-23.
80. O'Neill J. Tackling Drug-Resistant Infections Globally: final report and recommendations, 2016.
